# Supplementary material for: Flavonoids Extraction from Propolis Attenuates Pathological Cardiac Hypertrophy through PI3K/AKT Signaling Pathway
Source: Hindawi journal article supplement (doi:10.1155/2016/6281376), 2016-01-01
Supplement: f1 [file 6281376.f1.pdf]

# Supplementary figure

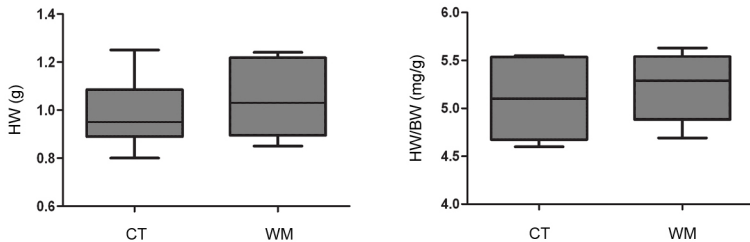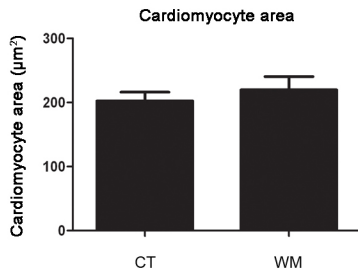

**Supplementary figure Cardiac hypertrophy phenotype is not altered by WM.** A selective PI3K antagonist, wortmannin (WM), on HW (g), HW/BW ratios (mg/g) for the animals and quantification of CM cross-sectional area in the left ventricular wall are shown. The results are expressed as the means  $\pm$ SE, n=5 mice per group (\*p<0.05 vs. CT).
